# Supplementary material
Source: PubMed Central journal article supplement (PMC4750417)
Supplement: supp_fj.15-281576_Supplemental_Data.pdf [file supp_fj.15-281576_Supplemental_Data.pdf]

**Supplementary figure 1: Validation of functionality of TRPM3 stably expressed in HEK-293 cells**

Pregnenolone sulfate and nifedipine induce  $\text{Ca}^{2+}$  responses in HEK-293 cells stably expressing TRPM3 channels: 10  $\mu\text{M}$  and 50  $\mu\text{M}$  of agonist concentration were used to induce the channel activity.

**Supplementary figure 2: Localization of TRPM3 in HEK-293 stably expressing the channel protein.**

In order to show the expression levels of TRPM3 immunocytochemistry was performed in HEK-293 cells stably expressing the protein. The cells were fixed and blocked using 3% BSA in PBS and were incubated with primary anti-Myc antibodies overnight at 4 °C, washed with PBS and incubated with fluorescent-labeled secondary antibodies (Alexa Fluor) at 1:2000 dilution for 1 h at room temperature. Before mounting, the slides were washed with PBS and incubated for 5 min with 4'-6-diamidino-2-phenylindole (*DAPI*) for nuclear staining. The cells images were obtained using Olympus BX61 confocal microscope with appropriate fluorescent filter (at 60X magnification) and analyzed with ImageJ software.

**Supplementary figure 3: Dose-response of TRPM3 with PS/PIP<sub>2</sub> and nifedipine.**

Dose-dependent changes in open probability of TRPM3 activated with PS in the presence of 5  $\mu\text{M}$  PIP<sub>2</sub> at 100 mV, left panel. Dose-dependent open probability of TRPM3 induced with nifedipine at 100 mV.
