# Supplementary material
Source: PubMed Central journal article supplement (PMC4750417)

Sup. Fig. 1.

## PS and nifedipine induce $\text{Ca}^{2+}$ responses in TRPM3 stable cell line

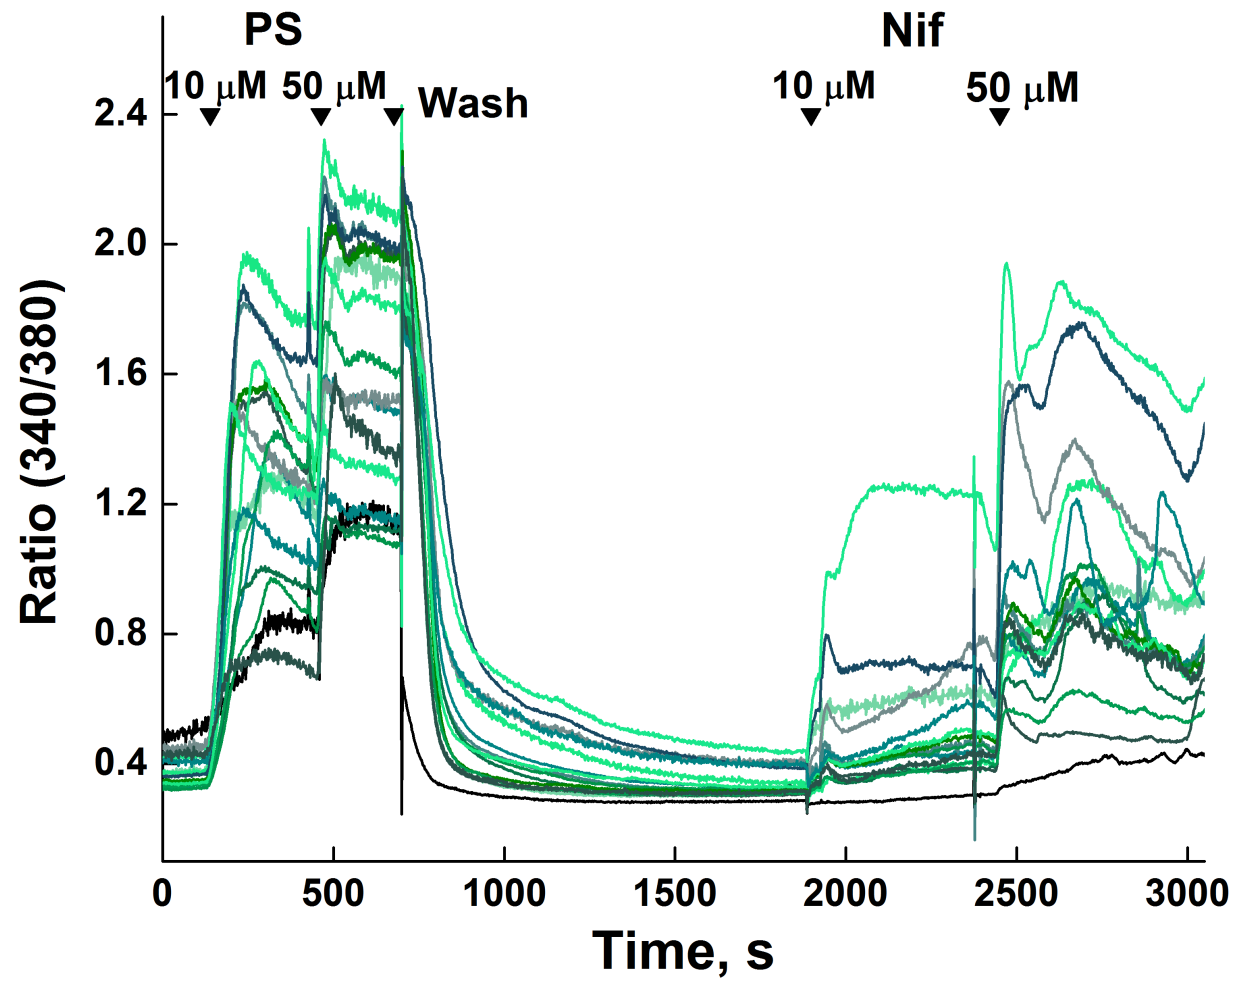

Sup. Fig. 2.

# HEK-293 stably expressing TRPM3

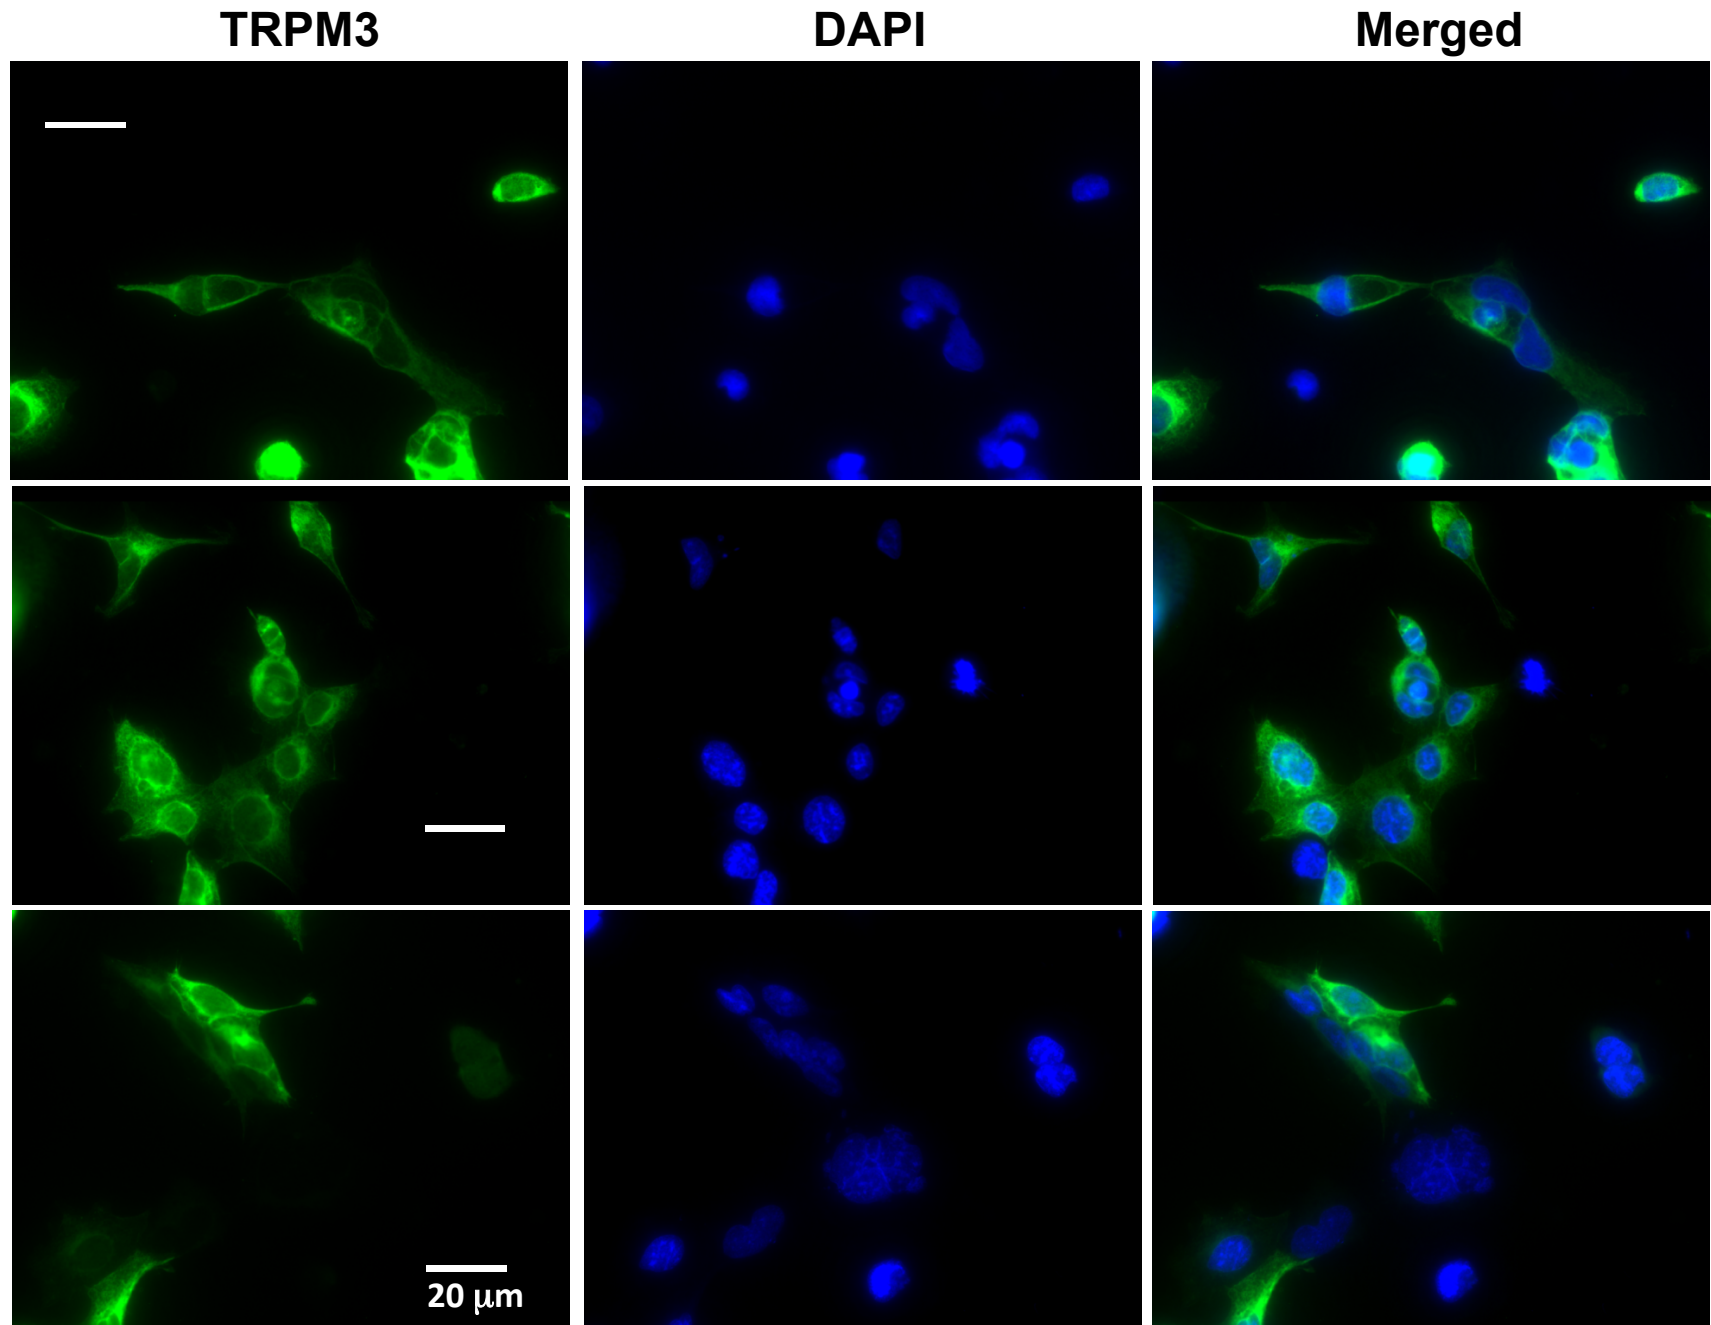

Sup. Fig. 3.

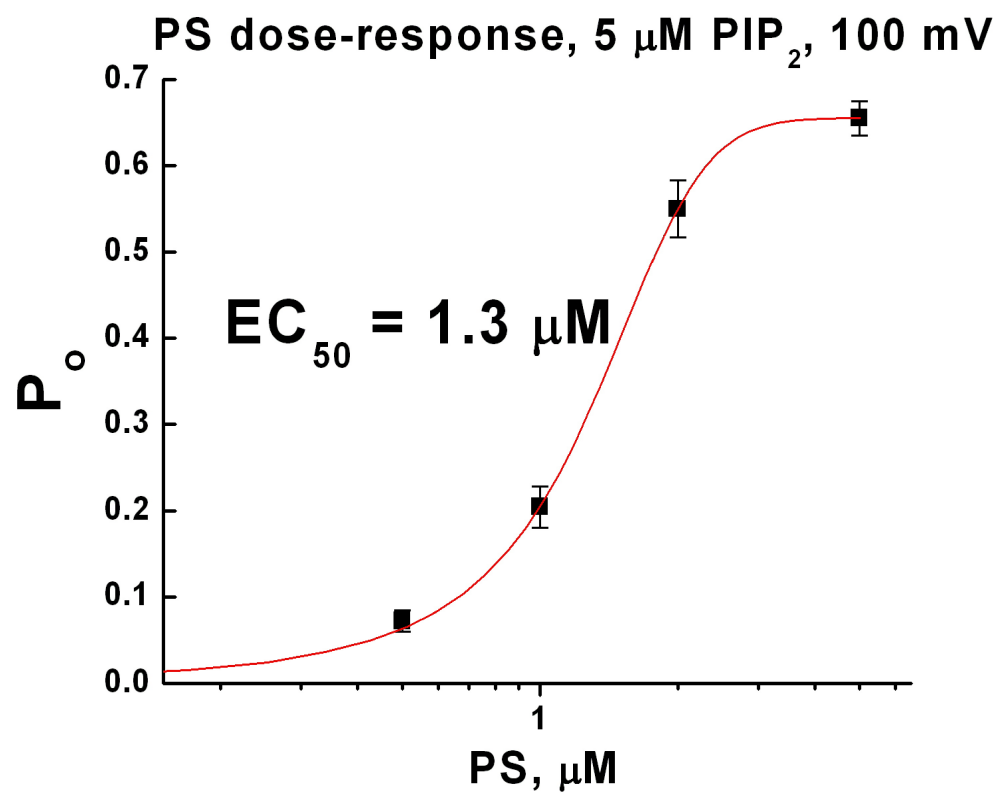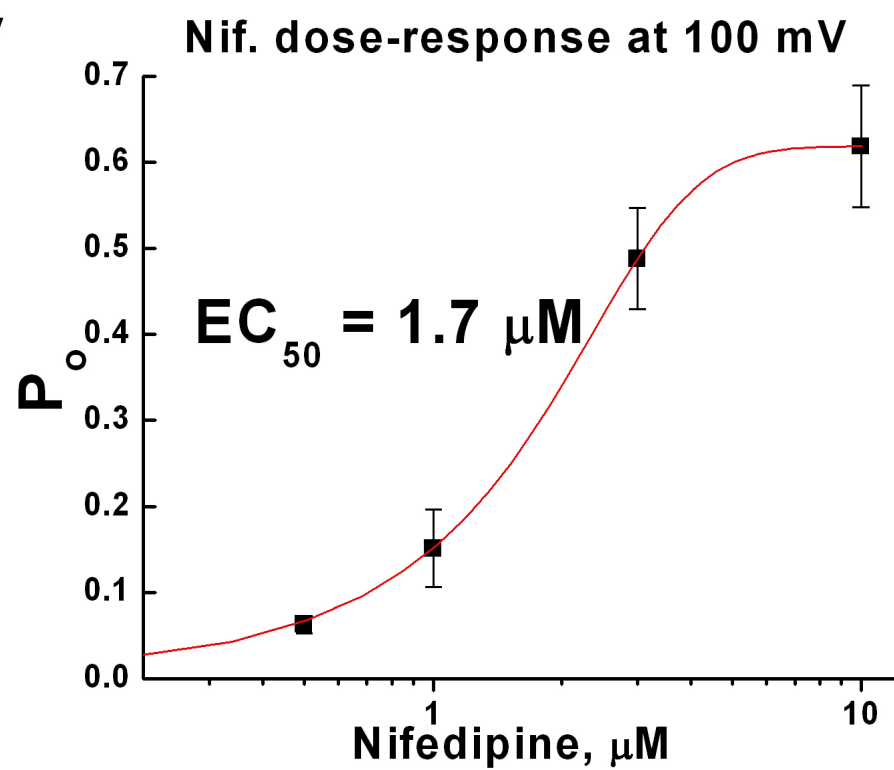

Supplement: supp_fj.15-281576_Supplemental_Figures.pdf [file supp_fj.15-281576_Supplemental_Figures.pdf]
